# Supplementary material for: Reactogenicity and safety of COVID-19 primary immunisation and booster vaccination regimens: a comparative observational cohort study
Source: Springer Nature journal article supplement (doi:10.1186/s12916-023-02924-5), 2023-06-20
Supplement: MOESM3 [file 25516960]

## Additional File

**Table S1: Descriptive results of the short-term surveys**

|                                                                                | After first vaccination<br>Comparison of vaccines |            |            |            | After second vaccination<br>Comparison of vaccination regimens |              |                |              |               | After third vaccination<br>Comparison of vaccination regimens |            |                |           |                     |            |
|--------------------------------------------------------------------------------|---------------------------------------------------|------------|------------|------------|----------------------------------------------------------------|--------------|----------------|--------------|---------------|---------------------------------------------------------------|------------|----------------|-----------|---------------------|------------|
|                                                                                | mRNA                                              |            | vector     |            | hom. mRNA                                                      |              | hom.<br>vector | het.         |               | hom. PI mRNA                                                  |            | hom. PI vector |           | het. PI mRNA/vector |            |
|                                                                                | BNT                                               | 1273       | ChAd       | Ad26       | BNT-<br>BNT                                                    | 1273<br>1273 | ChAd-<br>ChAd  | ChAd-<br>BNT | ChAd-<br>1273 | BNT                                                           | 1273       | BNT            | 1273      | BNT                 | 1273       |
| <b>N</b>                                                                       | <b>2044</b>                                       | <b>687</b> | <b>177</b> | <b>155</b> | <b>5391</b>                                                    | <b>1386</b>  | <b>439</b>     | <b>1098</b>  | <b>820</b>    | <b>884</b>                                                    | <b>782</b> | <b>84</b>      | <b>59</b> | <b>204</b>          | <b>229</b> |
| <b>Participants with COVID-19 infection after vaccination</b>                  |                                                   |            |            |            |                                                                |              |                |              |               |                                                               |            |                |           |                     |            |
| %                                                                              | 0.3                                               | 0.1        | 0.0        | 0.0        | 0.2                                                            | 0.2          | 0.0            | 0.1          | 0.0           | 1.7                                                           | 0.6        | 0.0            | 0.0       | 0.0                 | 0.0        |
| NA                                                                             | 11                                                | 2          | 0          | 1          | 10                                                             | 3            | 2              | 0            | 5             | 0                                                             | 0          | 0              | 0         | 0                   | 0          |
| <b>Participants with at least one symptom (local, systemic or unsolicited)</b> |                                                   |            |            |            |                                                                |              |                |              |               |                                                               |            |                |           |                     |            |
| %                                                                              | 70.3                                              | 83.0       | 85.3       | 80.6       | 72.9                                                           | 91.1         | 56.2           | 82.5         | 90.7          | 71.4                                                          | 80.8       | 59.5           | 71.2      | 75.5                | 70.7       |
| N                                                                              | 1437                                              | 570        | 151        | 125        | 3931                                                           | 1263         | 246            | 906          | 744           | 631                                                           | 632        | 50             | 42        | 154                 | 162        |
| <b>Participants with at least one local reaction</b>                           |                                                   |            |            |            |                                                                |              |                |              |               |                                                               |            |                |           |                     |            |
| %                                                                              | 57.5                                              | 73.9       | 54.2       | 47.7       | 55.8                                                           | 78.7         | 32.6           | 61.6         | 77.2          | 57.4                                                          | 69.2       | 47.6           | 52.5      | 56.9                | 58.1       |
| n                                                                              | 1175                                              | 508        | 96         | 74         | 3007                                                           | 1091         | 143            | 676          | 633           | 507                                                           | 541        | 40             | 31        | 116                 | 133        |
| <b>Thereof percentage of participants who reported consequences</b>            |                                                   |            |            |            |                                                                |              |                |              |               |                                                               |            |                |           |                     |            |
| None                                                                           | 95.0                                              | 86.2       | 94.8       | 90.5       | 92.5                                                           | 83.0         | 89.5           | 91.0         | 85.6          | 90.7                                                          | 93.2       | 90.0           | 93.5      | 92.2                | 91.7       |
| Medication intake                                                              | 3.0                                               | 8.5        | 4.2        | 6.8        | 4.3                                                            | 9.9          | 3.5            | 4.3          | 7.1           | 4.9                                                           | 5.2        | 2.5            | 3.2       | 2.6                 | 6.0        |
| Sick leave                                                                     | 1.0                                               | 3.0        | 1.0        | 1.4        | 2.2                                                            | 4.2          | 5.6            | 3.0          | 5.4           | 3.7                                                           | 1.3        | 5.0            | 0.0       | 2.6                 | 2.3        |
| Ambulatory consultation                                                        | 1.0                                               | 2.0        | 0.0        | 1.4        | 1.0                                                            | 2.7          | 1.4            | 1.6          | 1.6           | 0.6                                                           | 0.4        | 2.5            | 3.2       | 2.6                 | 0.0        |
| Hospital outpatient consultation                                               | 0.0                                               | 0.4        | 0.0        | 0.0        | 0.1                                                            | 0.2          | 0.0            | 0.0          | 0.2           | 0.0                                                           | 0.0        | 0.0            | 0.0       | 0.0                 | 0.0        |
| Hospitalisation                                                                | 0.0                                               | 0.0        | 0.0        | 0.0        | 0.0                                                            | 0.0          | 0.0            | 0.1          | 0.2           | 0.0                                                           | 0.0        | 0.0            | 0.0       | 0.0                 | 0.0        |
| <b>Participants with at least one systemic reaction</b>                        |                                                   |            |            |            |                                                                |              |                |              |               |                                                               |            |                |           |                     |            |
| %                                                                              | 48.5                                              | 59.2       | 81.9       | 77.4       | 61.8                                                           | 85.1         | 48.5           | 76.0         | 85.5          | 58.1                                                          | 69.3       | 42.9           | 61.0      | 63.7                | 57.2       |
| n                                                                              | 992                                               | 407        | 145        | 120        | 3329                                                           | 1180         | 213            | 834          | 701           | 514                                                           | 542        | 36             | 36        | 130                 | 131        |

Reactogenicity and safety of COVID-19 primary immunisation and booster vaccination regimens

| <b>Thereof percentage of participants who reported consequences</b> |      |      |      |      |      |      |      |      |      |      |      |      |      |      |      |
|---------------------------------------------------------------------|------|------|------|------|------|------|------|------|------|------|------|------|------|------|------|
| None                                                                | 71.3 | 67.1 | 46.2 | 40.8 | 58.6 | 40.1 | 58.2 | 44.7 | 36.4 | 54.1 | 54.2 | 52.8 | 66.7 | 50.0 | 55.7 |
| Medication intake                                                   | 19.5 | 21.6 | 37.9 | 33.3 | 25.5 | 36.4 | 26.8 | 34.3 | 36.9 | 28.0 | 31.4 | 16.7 | 27.8 | 33.1 | 25.2 |
| Sick leave                                                          | 4.5  | 5.4  | 11.0 | 23.3 | 11.4 | 18.5 | 11.7 | 15.0 | 20.3 | 13.4 | 11.1 | 25.0 | 5.6  | 11.5 | 16.0 |
| Ambulatory consultation                                             | 3.8  | 5.9  | 4.8  | 2.5  | 3.8  | 4.7  | 2.8  | 4.4  | 5.1  | 3.9  | 3.1  | 5.6  | 0.0  | 5.4  | 2.3  |
| Hospital outpatient consultation                                    | 0.6  | 0.0  | 0.0  | 0.0  | 0.4  | 0.3  | 0.5  | 1.1  | 1.0  | 0.4  | 0.0  | 0.0  | 0.0  | 0.0  | 0.8  |
| Hospitalisation                                                     | 0.3  | 0.0  | 0.0  | 0.0  | 0.2  | 0.0  | 0.0  | 0.5  | 0.3  | 0.2  | 0.2  | 0.0  | 0.0  | 0.0  | 0.0  |
| <b>Participants with at least one unsolicited reaction</b>          |      |      |      |      |      |      |      |      |      |      |      |      |      |      |      |
| %                                                                   | 9.7  | 13.8 | 15.8 | 11.0 | 11.9 | 13.3 | 7.1  | 12.5 | 11.8 | 16.2 | 15.3 | 4.8  | 13.6 | 8.8  | 7.0  |
| <i>n</i>                                                            | 198  | 95   | 28   | 17   | 642  | 184  | 31   | 137  | 97   | 143  | 120  | 4    | 8    | 18   | 16   |
| <b>Thereof percentage of participants who reported consequences</b> |      |      |      |      |      |      |      |      |      |      |      |      |      |      |      |
| None                                                                | 67.2 | 72.6 | 75.0 | 52.9 | 66.0 | 64.1 | 77.4 | 59.1 | 60.8 | 65.7 | 63.3 | 25.0 | 62.5 | 77.8 | 81.2 |
| Medication intake                                                   | 14.6 | 10.5 | 10.7 | 23.5 | 13.7 | 11.4 | 9.7  | 17.5 | 13.0 | 12.6 | 15.8 | 25.0 | 12.5 | 0.0  | 6.2  |
| Sick leave                                                          | 6.1  | 2.1  | 3.6  | 23.5 | 5.6  | 8.7  | 3.2  | 7.3  | 9.3  | 7.0  | 10.0 | 0.0  | 12.5 | 11.1 | 6.2  |
| Ambulatory consultation                                             | 11.1 | 14.7 | 7.1  | 0.0  | 12.3 | 14.1 | 9.7  | 12.4 | 13.4 | 13.3 | 9.2  | 50.0 | 12.5 | 5.6  | 6.2  |
| Hospital outpatient consultation                                    | 0.5  | 0.0  | 3.6  | 0.0  | 1.4  | 1.6  | 0.0  | 2.2  | 2.1  | 0.7  | 0.8  | 0.0  | 0.0  | 5.6  | 0.0  |
| Hospitalisation                                                     | 0.5  | 0.0  | 0.0  | 0.0  | 0.9  | 0.9  | 0.0  | 1.5  | 1.0  | 0.7  | 0.8  | 0.0  | 0.0  | 0.0  | 0.0  |

Hom.: homologous vaccination regimen. Het: heterologous vaccination regimen. PI: primary immunization. BNT: BNT126b2. 1273: mRNA-1273. ChAd: ChAdOx1. Ad26: Ad26.COVID-19-S. PI mRNA = PI with BNT162b2 or mRNA-1273. PI vector: PI with ChAdOx1. PI mRNA/vector: PI with BNT162b2 or mRNA-1273 and ChAdOx1. Consequences named in hierarchical order (multiple choice was possible). The consequence perceived as most serious is reported (from no consequence to medication intake, sick leave, outpatient (practice) consultation, clinic (ambulant) consultation, and inpatient consultation).

**Table S2: Influence of SARS-CoV-2 infection on reporting outcomes. Logistic regression.**

a) Short-term survey after first vaccination (N=3060)

| Outcome: Local reactions               |        |        |        |         | Outcome: Systemic reactions |        |        |         |
|----------------------------------------|--------|--------|--------|---------|-----------------------------|--------|--------|---------|
|                                        | OR     | 95%-CI |        | p       | OR                          | 95%-CI |        | p       |
| Intercept                              | 2.9577 | 2.2780 | 3.8475 | 0.00000 | 1.8049                      | 1.3952 | 2.3369 | 0.00001 |
| 1273                                   | 2.0550 | 1.6872 | 2.5116 | 0.00000 | 1.4865                      | 1.2401 | 1.7838 | 0.00002 |
| ChAd                                   | 1.1051 | 0.7970 | 1.5360 | 0.55006 | 6.3976                      | 4.3069 | 9.7755 | 0.00000 |
| Ad26                                   | 0.6803 | 0.4836 | 0.9557 | 0.02639 | 4.2239                      | 2.8664 | 6.3743 | 0.00000 |
| Age                                    | 0.9710 | 0.9656 | 0.9763 | 0.00000 | 0.9716                      | 0.9663 | 0.9769 | 0.00000 |
| Female                                 | 2.0996 | 1.8001 | 2.4501 | 0.00000 | 1.7987                      | 1.5429 | 2.0980 | 0.00000 |
| mSCQ                                   | 1.0432 | 0.9917 | 1.0979 | 0.10290 | 1.1873                      | 1.1270 | 1.2527 | 0.00000 |
| Interval vaccination-registration      | 1.0125 | 0.9891 | 1.0366 | 0.30009 | 1.0290                      | 1.0053 | 1.0535 | 0.01685 |
| SARS-CoV-2 infection since vaccination | 0.2652 | 0.0518 | 1.1238 | 0.08027 | 1.8033                      | 0.4392 | 9.2260 | 0.43262 |

b) Long-term survey after first vaccination (N=3027)

| Outcome: Doctor's consultation         |        |        |         |         | Outcome: Hospital care |        |         |         |
|----------------------------------------|--------|--------|---------|---------|------------------------|--------|---------|---------|
|                                        | OR     | 95%-CI |         | p       | OR                     | 95%-CI |         | p       |
| Intercept                              | 0.1032 | 0.0693 | 0.1524  | 0.00000 | 0.0136                 | 0.0047 | 0.0368  | 0.00000 |
| 1273                                   | 1.1672 | 0.8943 | 1.5134  | 0.24891 | 1.0504                 | 0.4801 | 2.1194  | 0.89554 |
| ChAd                                   | 1.6712 | 1.0837 | 2.5076  | 0.01609 | 2.1914                 | 0.7295 | 5.3729  | 0.11577 |
| Ad26                                   | 1.6889 | 1.0512 | 2.6242  | 0.02420 | 1.5466                 | 0.3633 | 4.5160  | 0.48244 |
| Age                                    | 0.9916 | 0.9840 | 0.9992  | 0.03027 | 0.9858                 | 0.9659 | 1.0056  | 0.16124 |
| Female                                 | 1.6353 | 1.3050 | 2.0569  | 0.00002 | 1.4477                 | 0.8080 | 2.6757  | 0.22294 |
| mSCQ                                   | 1.2739 | 1.2048 | 1.3476  | 0.00000 | 1.2625                 | 1.1220 | 1.4037  | 0.00004 |
| Interval vaccination-registration      | 1.0060 | 0.9981 | 1.0136  | 0.12820 | 1.0177                 | 0.9989 | 1.0354  | 0.05346 |
| SARS-CoV-2 infection since last survey | 7.7373 | 2.5949 | 23.0726 | 0.00018 | 5.3177                 | 0.2865 | 28.5068 | 0.11486 |

Reactogenicity and safety of COVID-19 primary immunisation and booster vaccination regimens

c) Short-term survey after second vaccination (N=9104)

| Outcome: Local reactions               |        |        |        |         | Outcome: Systemic reactions |        |        |         |
|----------------------------------------|--------|--------|--------|---------|-----------------------------|--------|--------|---------|
|                                        | OR     | 95%-CI |        | p       | OR                          | 95%-CI |        | p       |
| Intercept                              | 3.4808 | 2.6673 | 4.5488 | 0.00000 | 7.0459                      | 5.2756 | 9.4407 | 0.00000 |
| 1273,1273                              | 3.0953 | 2.6804 | 3.5837 | 0.00000 | 3.8259                      | 3.2550 | 4.5167 | 0.00000 |
| ChAd,ChAd                              | 0.5671 | 0.4198 | 0.7645 | 0.00021 | 1.1316                      | 0.8311 | 1.5439 | 0.43387 |
| ChAd,BNT                               | 1.4891 | 1.1852 | 1.8733 | 0.00065 | 2.9743                      | 2.3062 | 3.8530 | 0.00000 |
| ChAd,1273                              | 3.1589 | 2.3878 | 4.1925 | 0.00000 | 5.5164                      | 4.0213 | 7.6163 | 0.00000 |
| Age                                    | 0.9702 | 0.9670 | 0.9734 | 0.00000 | 0.9665                      | 0.9631 | 0.9699 | 0.00000 |
| Female                                 | 2.1073 | 1.9238 | 2.3087 | 0.00000 | 1.9836                      | 1.8021 | 2.1837 | 0.00000 |
| mSCQ                                   | 1.0889 | 1.0584 | 1.1205 | 0.00000 | 1.1243                      | 1.0906 | 1.1596 | 0.00000 |
| Interval between vaccinations          | 0.9975 | 0.9917 | 1.0033 | 0.39120 | 0.9912                      | 0.9849 | 0.9975 | 0.00636 |
| Interval vaccination-registration      | 1.0070 | 1.0046 | 1.0094 | 0.00000 | 1.0081                      | 1.0056 | 1.0106 | 0.00000 |
| SARS-CoV-2 infection since vaccination | 0.5656 | 0.1942 | 1.5511 | 0.27449 | 0.6699                      | 0.2406 | 1.8804 | 0.43772 |

d) Long-term survey after second vaccination (N=9328)

| Outcome: Doctor's consultation         |        |        |         |         | Outcome: Hospital care |        |         |         |
|----------------------------------------|--------|--------|---------|---------|------------------------|--------|---------|---------|
|                                        | OR     | 95%-CI |         | p       | OR                     | 95%-CI |         | p       |
| Intercept                              | 0.0885 | 0.0619 | 0.1256  | 0.00000 | 0.0098                 | 0.0034 | 0.0268  | 0.00000 |
| 1273,1273                              | 1.1506 | 0.9736 | 1.3556  | 0.09642 | 0.8786                 | 0.5246 | 1.4001  | 0.60346 |
| ChAd,ChAd                              | 0.7278 | 0.4825 | 1.0840  | 0.12359 | 0.9610                 | 0.3194 | 2.6320  | 0.94108 |
| ChAd,BNT                               | 0.8543 | 0.6417 | 1.1301  | 0.27523 | 0.4654                 | 0.1874 | 1.0601  | 0.08292 |
| ChAd,1273                              | 0.8025 | 0.5660 | 1.1296  | 0.21193 | 0.2857                 | 0.0815 | 0.8640  | 0.03650 |
| Age                                    | 0.9984 | 0.9942 | 1.0025  | 0.44075 | 1.0039                 | 0.9923 | 1.0156  | 0.51484 |
| Female                                 | 1.6351 | 1.4456 | 1.8519  | 0.00000 | 0.8944                 | 0.6420 | 1.2511  | 0.51117 |
| mSCQ                                   | 1.2375 | 1.2005 | 1.2757  | 0.00000 | 1.2215                 | 1.1397 | 1.3028  | 0.00000 |
| Interval between vaccinations          | 1.0052 | 0.9976 | 1.0130  | 0.18285 | 1.0059                 | 0.9838 | 1.0299  | 0.61639 |
| Interval vaccination-registration      | 1.0102 | 1.0070 | 1.0134  | 0.00000 | 1.0166                 | 1.0073 | 1.0266  | 0.00067 |
| SARS-CoV-2 infection since last survey | 8.7941 | 4.4012 | 18.0569 | 0.00000 | 5.3004                 | 1.2464 | 15.3881 | 0.00709 |

Reactogenicity and safety of COVID-19 primary immunisation and booster vaccination regimens

e) Follow-up survey after first/second vaccination (N=9591)

| Outcome: Doctor's consultation         |        |        |         |         | Outcome: Hospital care |        |        |         |
|----------------------------------------|--------|--------|---------|---------|------------------------|--------|--------|---------|
|                                        | OR     | 95%-CI |         | p       | OR                     | 95%-CI |        | p       |
| Intercept                              | 1.2434 | 0.7455 | 2.0932  | 0.40703 | 0.0649                 | 0.0187 | 0.1890 | 0.00000 |
| 1273,1273                              | 1.0941 | 0.9397 | 1.2709  | 0.24305 | 0.9907                 | 0.6672 | 1.4303 | 0.96155 |
| ChAd,ChAd                              | 0.8647 | 0.6078 | 1.2197  | 0.41282 | 0.9294                 | 0.3814 | 2.1020 | 0.86622 |
| ChAd,BNT                               | 0.8823 | 0.6837 | 1.1337  | 0.33173 | 0.5448                 | 0.2663 | 1.0558 | 0.08349 |
| ChAd,1273                              | 0.7878 | 0.5723 | 1.0787  | 0.14011 | 0.4239                 | 0.1622 | 1.0181 | 0.06623 |
| Age                                    | 0.9975 | 0.9938 | 1.0012  | 0.18739 | 0.9972                 | 0.9879 | 1.0066 | 0.55879 |
| Female                                 | 1.3714 | 1.2300 | 1.5301  | 0.00000 | 0.8546                 | 0.6532 | 1.1213 | 0.25366 |
| mSCQ                                   | 1.2630 | 1.2277 | 1.2996  | 0.00000 | 1.2094                 | 1.1410 | 1.2784 | 0.00000 |
| Interval between vaccinations          | 0.9978 | 0.9913 | 1.0045  | 0.51493 | 0.9979                 | 0.9810 | 1.0158 | 0.80990 |
| Interval vaccination-registration      | 1.0085 | 1.0063 | 1.0108  | 0.00000 | 1.0156                 | 1.0102 | 1.0209 | 0.00000 |
| SARS-CoV-2 infection since last survey | 6.5338 | 4.1758 | 10.3572 | 0.00000 | 2.2848                 | 0.7866 | 5.2681 | 0.08206 |

f) Short-term survey after third vaccination (N=2241)

| Outcome: Local reactions               |        |        |        |         | Outcome: Systemic reaction |        |        |         |
|----------------------------------------|--------|--------|--------|---------|----------------------------|--------|--------|---------|
|                                        | OR     | 95%-CI |        | p       | OR                         | 95%-CI |        | p       |
| Intercept                              | 2.3197 | 1.7154 | 3.1430 | 0.00000 | 3.3265                     | 2.4481 | 4.5336 | 0.00000 |
| PI mRNA + mRNA-1273                    | 2.3341 | 1.8740 | 2.9147 | 0.00000 | 2.4870                     | 1.9911 | 3.1154 | 0.00000 |
| PI vector + BNT162b2                   | 1.0768 | 0.6702 | 1.7286 | 0.75884 | 0.8789                     | 0.5416 | 1.4179 | 0.59817 |
| PI vector + mRNA-1273                  | 1.2670 | 0.7318 | 2.2040 | 0.39809 | 1.8848                     | 1.0787 | 3.3550 | 0.02785 |
| PI mRNA/vector + BNT162b2              | 1.0727 | 0.7816 | 1.4765 | 0.66511 | 1.4180                     | 1.0241 | 1.9754 | 0.03698 |
| PI mRNA/vector + mRNA-1273             | 1.8178 | 1.3201 | 2.5143 | 0.00027 | 1.8823                     | 1.3640 | 2.6093 | 0.00013 |
| Age                                    | 0.9721 | 0.9657 | 0.9786 | 0.00000 | 0.9637                     | 0.9571 | 0.9702 | 0.00000 |
| Female                                 | 1.9851 | 1.6579 | 2.3787 | 0.00000 | 1.6915                     | 1.4097 | 2.0307 | 0.00000 |
| mSCQ                                   | 1.1035 | 1.0390 | 1.1738 | 0.00154 | 1.1283                     | 1.0607 | 1.2026 | 0.00016 |
| Interval vaccination-registration      | 1.0090 | 0.9805 | 1.0386 | 0.54264 | 1.0496                     | 1.0188 | 1.0821 | 0.00162 |
| SARS-CoV-2 infection since vaccination | 1.0414 | 0.4099 | 2.8655 | 0.93374 | 1.5802                     | 0.5863 | 5.0139 | 0.39349 |

Reactogenicity and safety of COVID-19 primary immunisation and booster vaccination regimens

g) Long-term survey after third vaccination (N=2371)

| Outcome: Doctor's consultation         |        |        |        |         | Outcome: Hospital care |        |           |         |
|----------------------------------------|--------|--------|--------|---------|------------------------|--------|-----------|---------|
|                                        | OR     | 95%-CI |        | p       | OR                     | 95%-CI |           | p       |
| Intercept                              | 0.1438 | 0.0961 | 0.2131 | 0.00000 | 0.0076                 | 0.0022 | 0.2280000 | 0.00000 |
| PI mRNA + mRNA-1273                    | 0.9551 | 0.7313 | 1.2466 | 0.73549 | 1.1159                 | 0.5368 | 2.336000  | 0.76808 |
| PI vector + BNT162b2                   | 1.2638 | 0.7058 | 2.1694 | 0.41152 | 2.6940                 | 0.8221 | 7.577300  | 0.07458 |
| PI vector + mRNA-1273                  | 0.4508 | 0.1642 | 1.0338 | 0.08472 | NA*                    | NA*    | NA*       | NA*     |
| PI mRNA/vector + BNT162b2              | 0.7717 | 0.4963 | 1.1674 | 0.23356 | 1.1094                 | 0.3111 | 3.132700  | 0.85639 |
| PI mRNA/vector + mRNA-1273             | 0.9210 | 0.5930 | 1.3998 | 0.70666 | 0.4664                 | 0.0717 | 1.741400  | 0.32349 |
| Age                                    | 0.9961 | 0.9878 | 1.0043 | 0.35039 | 1.0099                 | 0.9877 | 1.032300  | 0.37806 |
| Female                                 | 1.1808 | 0.9360 | 1.4933 | 0.16275 | 0.7099                 | 0.3760 | 1.339800  | 0.28726 |
| mSCQ                                   | 1.2875 | 1.2095 | 1.3710 | 0.00000 | 1.2650                 | 1.0863 | 1.449600  | 0.00128 |
| Interval vaccination-registration      | 1.0252 | 1.0076 | 1.0423 | 0.00386 | 1.0399                 | 0.9969 | 1.077100  | 0.04460 |
| SARS-CoV-2 infection since last survey | 3.2445 | 1.7012 | 5.9665 | 0.00021 | 5.3910                 | 1.2476 | 16.20680  | 0.00767 |

h) Follow-up survey after third vaccination (N=2304)

| Outcome: Doctor's consultation         |        |        |        |         | Outcome: Hospital care |        |        |         |
|----------------------------------------|--------|--------|--------|---------|------------------------|--------|--------|---------|
|                                        | OR     | 95%-CI |        | p       | OR                     | 95%-CI |        | p       |
| Intercept                              | 0.2560 | 0.1816 | 0.3592 | 0.00000 | 0.0157                 | 0.0058 | 0.0390 | 0.00000 |
| PI mRNA + mRNA-1273                    | 1.0359 | 0.8345 | 1.2858 | 0.74912 | 0.7556                 | 0.4060 | 1.3832 | 0.36701 |
| PI vector + BNT162b2                   | 0.9235 | 0.5653 | 1.4766 | 0.74459 | 1.1565                 | 0.3283 | 3.1544 | 0.79622 |
| PI vector + mRNA-1273                  | 0.7712 | 0.4075 | 1.3924 | 0.40446 | 0.9869                 | 0.1550 | 3.4858 | 0.98602 |
| PI mRNA/vector + BNT162b2              | 0.8212 | 0.5791 | 1.1514 | 0.26039 | 1.5689                 | 0.6816 | 3.3031 | 0.25756 |
| PI mRNA/vector + mRNA-1273             | 0.8449 | 0.5985 | 1.1823 | 0.33126 | 0.6284                 | 0.2066 | 1.5716 | 0.35949 |
| Age                                    | 1.0015 | 0.9947 | 1.0082 | 0.66513 | 1.0132                 | 0.9957 | 1.0308 | 0.13796 |
| Female                                 | 1.1952 | 0.9910 | 1.4429 | 0.06269 | 0.8819                 | 0.5308 | 1.4772 | 0.62876 |
| mSCQ                                   | 1.1949 | 1.1294 | 1.2649 | 0.00000 | 1.1375                 | 0.9960 | 1.2796 | 0.04233 |
| Interval vaccination-registration      | 1.0140 | 1.0062 | 1.0222 | 0.00050 | 1.0137                 | 0.9984 | 1.0261 | 0.04535 |
| SARS-CoV-2 infection since last survey | 1.7509 | 1.4212 | 2.1557 | 0.00000 | 0.6514                 | 0.3076 | 1.2488 | 0.22556 |

Note: Hom.: homologous vaccination regimen. Het: heterologous vaccination regimen. PI: primary immunization. BNT: BNT126b2. 1273: mRNA-1273. ChAd: ChAdOx1. Ad26: Ad26.COV2-S. PI mRNA = PI with BNT162b2 or mRNA-1273. PI vector: PI with ChAdOx1. PI mRNA/vector: PI with BNT162b2 or mRNA-1273 and ChAdOx1. mSCQ: modified German version of the Self-Administered Comorbidity Questionnaire. Reference vaccine or vaccination regimen: BNT162b2 or BNT162b2 + BNT162b2 or mRNA primary immunisation + BNT162b2. Age in years, reference gender: male (divers: excluded due to small n), mSCQ: continuous variable, interval in days. \*no events in this group
